# Supplementary material for: Gender differences in clinical presentation and 1-year outcomes in atrial fibrillation
Source: PubMed Central journal article supplement — Heart. 2017 Feb 22;103(13):1024–30. doi: 10.1136/heartjnl-2016-310406 (PMC5529986; doi:10.1136/heartjnl-2016-310406), 2017-02-22
Supplement: heartjnl-2016-310406supp001.pdf [file heartjnl-2016-310406supp001.pdf]

## Gender Differences in Clinical Presentation and One-Year Outcomes in Atrial Fibrillation

Renate B. Schnabel, Ladislav Pecen, Francisco M. Ojeda, Markus Lucerna, Nargiz Rzayeva, Stefan Blankenberg, Harald Darius, Dipak Kotecha, Raffaele De Caterina, Paulus Kirchhof

### Supplementary Tables 1-9

**Supplementary Tables 1:** Baseline characteristics of PREFER in AF study participants without follow-up by gender.

| Variables                                                    | Women without<br>Follow up<br>N=340 | Men without<br>Follow up<br>N=474 |
|--------------------------------------------------------------|-------------------------------------|-----------------------------------|
| <b>Risk factors</b>                                          |                                     |                                   |
| Age, years (SD)                                              | 72.5 (10.9)                         | 67.4 (12.7)                       |
| Body mass index, kg/m <sup>2</sup> (SD)                      | 27.9 (5.3)                          | 27.9 (4.5)                        |
| Systolic blood pressure, mm Hg (SD)                          | 134.6 (16.5)                        | 131.5 (16.6)                      |
| Ever smoking, N (%)                                          | 68 (20.4)                           | 238 (50.9)                        |
| Alcohol excess (≥8 units/week), N (%)                        | 3 (0.9)                             | 15 (3.3)                          |
| Lack of guideline compliance in anticoagulant therapy, N (%) | 10 (3.0)                            | 12 (2.6)                          |
| EHRA score >2, N (%)                                         | 218 (65.1)                          | 253 (54.2)                        |
| CHA <sub>2</sub> DS <sub>2</sub> -VASc ≥2†, N (%)            | 258 (94.5)                          | 283 (74.1)                        |
| HASBLED ≥2, N (%)                                            | 176 (73.6)                          | 193 (57.6)                        |
| <b>Disease history</b>                                       |                                     |                                   |
| Diabetes mellitus, N (%)                                     | 85 (25.3)                           | 110 (23.5)                        |
| Dyslipidaemia, N (%)                                         | 155 (46.6)                          | 198 (42.4)                        |
| Chronic renal insufficiency, N (%)                           | 33 (10.1)                           | 52 (11.2)                         |
| Chronic hepatic disease, N (%)                               | 11 (3.3)                            | 12 (2.6)                          |
| Hyperthyroidism, N (%)                                       | 18 (5.4)                            | 12 (2.6)                          |
| Chronic obstructive pulmonary disease, N (%)                 | 29 (8.7)                            | 58 (12.4)                         |

Supplementary material - Gender in atrial fibrillation

| <b>Variables</b>                                                                          | <b>Women without<br/>Follow up<br/>N=340</b> | <b>Men without<br/>Follow up<br/>N=474</b> |
|-------------------------------------------------------------------------------------------|----------------------------------------------|--------------------------------------------|
| Major gastrointestinal/ cerebrovascular/other bleeding events, N (%)                      | 13 (3.8)                                     | 13 (2.7)                                   |
| Prevalent cardiovascular disease (CHD, peripheral arterial disease, MI infarction), N (%) | 53 (16.1)                                    | 116 (25.3)                                 |
| Stent insertion, N (%)                                                                    | 22 (6.7)                                     | 48 (10.4)                                  |
| Heart valve dysfunction, N (%)                                                            | 136 (40.5)                                   | 138 (29.7)                                 |
| Heart valve replacement, N (%)                                                            | 19 (5.7)                                     | 18 (3.9)                                   |
| Heart failure, N (%)                                                                      | 70 (20.8)                                    | 112 (24.1)                                 |
| Previous ischemic stroke/ TIA/other ischemic-thromboembolic event, N (%)                  | 142 (50.0)                                   | 184 (50.3)                                 |
| Sinus rhythm at baseline, N (%)                                                           | 133 (39.6)                                   | 166 (35.9)                                 |
| Adequate heart rate control (60-100 bpm) at baseline, N (%)                               | 142 (50.0)                                   | 184 (50.3)                                 |
| <b>Medication</b>                                                                         |                                              |                                            |
| Antiplatelet agents, non-steroidal antiinflammatory drugs, N (%)                          | 79 (23.4)                                    | 103 (22.0)                                 |
| Antiarrhythmic drugs, N(%)                                                                | 216 (63.5)                                   | 271 (57.2)                                 |

Mean and standard deviation (SD) and number and percentages are presented.

N=17 individuals without follow-up information had missing data on gender and are therefore not shown in the table.

\*Univariate odds ratios for gender were obtained by logistic regression adjusted for age and country.

†CHA<sub>2</sub>DS<sub>2</sub>-VASc score included the extra point for female gender. CHD, coronary heart disease; TIA, transient ischemic attack. \*\*Medication as used in the HAS-BLED score.

Lack of guideline compliance indicates lack of treatment with oral anticoagulant in the previous 12 months despite guideline indication without contraindication.

**Supplementary Table 2** Baseline variables entered into the stepwise regression analysis.

| <b>Variables</b>                                                                                              |
|---------------------------------------------------------------------------------------------------------------|
| Age                                                                                                           |
| Gender                                                                                                        |
| Country (Austria, Switzerland, Germany pooled together)                                                       |
| Systolic blood pressure                                                                                       |
| Body mass index                                                                                               |
| Ever smoking                                                                                                  |
| Lack of compliance                                                                                            |
| European Heart Rhythm Association (EHRA) score                                                                |
| Dyslipidaemia                                                                                                 |
| Hyperthyroidism                                                                                               |
| Chronic renal insufficiency                                                                                   |
| Chronic hepatic disease                                                                                       |
| Diabetes mellitus                                                                                             |
| Chronic obstructive pulmonary disease                                                                         |
| Prevalent cardiovascular disease (coronary heart disease, peripheral arterial disease, myocardial infarction) |
| Previous ischemic stroke/transient ischemic attack/ischemic-thromboembolic event (e.g. arterial embolism)     |
| Major gastrointestinal/cerebrovascular/other bleeding                                                         |
| Chronic heart insufficiency/reduced left ventricular ejection fraction                                        |
| Heart valve dysfunction (e.g. stenosis, insufficiency)                                                        |
| Heart valve replaced                                                                                          |
| Stent insertion                                                                                               |
| Electrical cardioversion                                                                                      |
| Ablation (pulmonary vein isolation)                                                                           |
| Pharmacological cardioversion                                                                                 |
| Antiplatelet agents, non-steroidal anti-inflammatory drugs                                                    |
| Antiarrhythmic drugs                                                                                          |
| Anticoagulation therapy category: Non-vitamin K antagonist (NOAC)                                             |
| Anticoagulation therapy category: Antiplatelet therapy only                                                   |
| Anticoagulation therapy category: Vitamin K antagonists only                                                  |
| Anticoagulation therapy category: Vitamin K antagonists & antiplatelet therapy                                |
| Anticoagulation therapy category: Heparin & fondaparinux                                                      |
| Anticoagulation therapy category: Other <sup>†</sup> or none                                                  |

<sup>†</sup>Other: (vitamin K antagonists & antiplatelet therapy & NOAC) or (antiplatelet therapy & NOAC)  
 Systolic blood pressure and BMI were entered as continuous variables. Country was entered as dummy variables.

Supplementary material - Gender in atrial fibrillation

**Supplementary Table 3** Symptoms according to European Heart Rhythm Association (EHRA) classification at baseline by gender in patients with new-onset AF (<90 days), N=847.

| Symptom             | Women      |            |              |           | Men         |            |              |           |
|---------------------|------------|------------|--------------|-----------|-------------|------------|--------------|-----------|
|                     | Never      | Occasional | Intermediate | Frequent  | Never       | Occasional | Intermediate | Frequent  |
| <b>Palpitations</b> | 97 (26.65) | 160 (44.0) | 74 (20.3)    | 33 (9.1)  | 189 (39.4)  | 190 (39.6) | 75 (15.6)    | 26 (5.4)  |
| <b>Fatigue</b>      | 90 (25.0)  | 135 (37.5) | 92 (25.6)    | 43 (11.9) | 158 (33.0)  | 172 (35.9) | 103 (21.5)   | 46 (9.6)  |
| <b>Dizziness</b>    | 201 (55.8) | 107 (29.7) | 43 (11.9)    | 9 (2.5)   | 320 (67.2)  | 122 (25.6) | 26 (5.5)     | 8 (1.7)   |
| <b>Dyspnoea</b>     | 122 (33.7) | 116 (32.0) | 75 (20.7)    | 49 (13.5) | 201 (41.6)  | 146 (30.2) | 82 (17.0)    | 54 (11.2) |
| <b>Chest pain</b>   | 262 (72.6) | 80 (22.2)  | 17 (4.7)     | 2 (0.55)  | 337 (70.35) | 103 (21.5) | 33 (6.9)     | 6 (1.25)  |
| <b>Anxiety</b>      | 140 (39.1) | 132 (36.9) | 50 (14.0)    | 36 (10.1) | 265 (56.0)  | 150 (31.7) | 43 (9.1)     | 15 (3.2)  |

Numbers and percent are provided.

**Supplementary Table 4** Variables associated with one-year incidence of ischemic stroke/TIA/arterial thromboembolic events.

| Variables selected*                                                 | Women<br>Events=62/2,422 |                         | Men<br>Events=73/3,697 |                         |
|---------------------------------------------------------------------|--------------------------|-------------------------|------------------------|-------------------------|
|                                                                     | Odds ratio               | 95% confidence interval | Odds ratio             | 95% confidence interval |
| Age                                                                 | 1.02                     | 0.99, 1.05              | 1.04                   | 1.00, 1.06              |
| Lack of guideline compliance in anticoagulant therapy               | 4.32                     | 1.92, 9.73              | 8.49                   | 4.20, 17.16             |
| Non-vitamin K antagonist                                            | 1.18                     | 0.39, 3.53              | 4.36                   | 2.00, 9.47              |
| Previous ischemic stroke/TIA/ischemic-thromboembolic event          | 3.16                     | 1.82, 5.47              | 2.78                   | 1.62, 4.78              |
| Pharmacological cardioversion                                       | 2.02                     | 1.12, 3.67              | 2.49                   | 1.45, 4.26              |
| Antiplatelet agents, non-steroidal anti-inflammatory drugs intake** | 1.28                     | 0.70, 2.35              | 1.69                   | 1.01, 2.84              |
| Heart failure                                                       | 1.88                     | 1.08, 3.27              | 1.50                   | 0.90, 2.52              |

\*Sex, age and country (not shown) were forced into the model during the stepwise selection procedure which was done on the complete dataset and separate odds ratios for men and women were calculated subsequently. TIA, transient ischemic attack. \*\*Medication as used in the HAS-BLED score.

**Supplementary Table 5** Variables associated with one-year incidence of acute coronary syndrome events.

| Variables selected*                                                                       | Women<br>Events=29/2,404 |                         | Men<br>Events=61/3,654 |                         |
|-------------------------------------------------------------------------------------------|--------------------------|-------------------------|------------------------|-------------------------|
|                                                                                           | Odds ratio               | 95% confidence interval | Odds ratio             | 95% confidence interval |
| Age                                                                                       | 1.05                     | 1.00, 1.10              | 1.02                   | 0.99, 1.06              |
| Previous cardiovascular disease (CHD, peripheral arterial disease, myocardial infarction) | 3.26                     | 1.47, 7.24              | 4.51                   | 2.33, 8.72              |
| Major bleeding                                                                            | 2.36                     | 0.67, 8.33              | 2.19                   | 0.95, 5.06              |
| Dyslipidaemia                                                                             | 1.84                     | 0.83, 4.11              | 2.14                   | 1.15, 4.00              |
| Chronic obstructive pulmonary disease                                                     | 3.18                     | 1.33, 7.60              | 1.36                   | 0.71, 2.61              |
| EHRA score                                                                                | 1.23                     | 0.78, 1.95              | 1.34                   | 0.99, 1.82              |
| Vitamin K antagonists only                                                                | 0.56                     | 0.26, 1.19              | 0.58                   | 0.34, 0.99              |

\*Sex, age and country (not shown) were forced into the model during the stepwise selection procedure which was done on the complete dataset and separate odds ratios for men and women were calculated subsequently. CHD, coronary heart disease.

**Supplementary Table 6** Variables associated with one-year incidence of coronary revascularization events.

| Variables selected*                                                    | Women<br>Events=21/2,459 |                         | Men<br>Events=82/3,752 |                         |
|------------------------------------------------------------------------|--------------------------|-------------------------|------------------------|-------------------------|
|                                                                        | Odds ratio               | 95% confidence interval | Odds ratio             | 95% confidence interval |
| Age                                                                    | 1.02                     | 0.97, 1.07              | 1.03                   | 1.00, 1.05              |
| Previous cardiovascular disease (CHD, peripheral arterial disease, MI) | 4.59                     | 1.86, 11.32             | 4.45                   | 2.72, 7.30              |
| Vitamin K antagonists only                                             | 0.58                     | 0.24, 1.40              | 0.77                   | 0.49, 1.21              |
| Previous ischemic stroke/TIA/ischemic-thromboembolic event             | 0.22                     | 0.03, 1.64              | 0.45                   | 0.20, 0.99              |

\*Sex, age and country (not shown) were forced into the model during the stepwise selection procedure which was done on the complete dataset and separate odds ratios for men and women were calculated subsequently. CHD, coronary heart disease; TIA, transient ischemic attack.

**Supplementary Table 7** Variables associated with one-year incidence of heart failure.

| Variables selected*                                   | Women<br>Events=73/1,739 |                         | Men<br>Events=82/2,536 |                         |
|-------------------------------------------------------|--------------------------|-------------------------|------------------------|-------------------------|
|                                                       | Odds ratio               | 95% confidence interval | Odds ratio             | 95% confidence interval |
| Age                                                   | 1.05                     | 1.02, 1.08              | 1.03                   | 1.00, 1.05              |
| Lack of guideline compliance in anticoagulant therapy | 1.02                     | 0.23, 4.46              | 5.27                   | 1.87, 14.84             |
| Heart valve replaced                                  | 1.06                     | 0.37, 3.04              | 3.74                   | 1.84, 7.64              |
| Chronic renal insufficiency                           | 1.81                     | 0.95, 3.46              | 1.88                   | 1.03, 3.42              |
| EHRA score                                            | 1.34                     | 1.01, 1.77              | 1.29                   | 1.00, 1.65              |

\*Sex, age and country (not shown) were forced into the model during the stepwise selection procedure which was done on the complete dataset and separate odds ratios for men and women were calculated subsequently.



**Supplementary Table 8** Variables associated with one-year incidence of major bleeding events.

| Variables selected*         | Women<br>Events=71/2,440 |                         | Men<br>Events=104/3,709 |                         |
|-----------------------------|--------------------------|-------------------------|-------------------------|-------------------------|
|                             | Odds ratio               | 95% confidence interval | Odds ratio              | 95% confidence interval |
| Age                         | 1.05                     | 1.01, 1.08              | 1.04                    | 1.01, 1.06              |
| Major bleeding              | 3.86                     | 1.86, 8.03              | 4.51                    | 2.58, 7.89              |
| Chronic hepatic disease     | 3.41                     | 1.24, 9.41              | 2.72                    | 1.03, 7.17              |
| Chronic renal insufficiency | 1.90                     | 1.08, 3.35              | 1.75                    | 1.09, 2.82              |
| Heart valve replaced        | 4.49                     | 2.32, 8.69              | 1.25                    | 0.59, 2.65              |
| Vitamin K antagonists only  | 0.57                     | 0.35, 0.95              | 0.70                    | 0.47, 1.04              |

\*sex, age and country (not shown) were forced into the model during the stepwise selection procedure which was done on the complete dataset and separate odds ratios for men and women were calculated subsequently.

**Supplementary Table 9** Area under receiver operator curve (AUC) for one-year outcomes by gender.

| Outcome                                    | Women |                         | Men  |                         |
|--------------------------------------------|-------|-------------------------|------|-------------------------|
|                                            | AUC   | 95% Confidence interval | AUC  | 95% Confidence interval |
| <b>Stroke/TIA/arterial thromboembolism</b> |       |                         |      |                         |
| CHA <sub>2</sub> DS <sub>2</sub> -VASc     | 0.65  | 0.57, 0.73              | 0.65 | 0.58, 0.72              |
| HAS-BLED                                   | 0.69  | 0.61, 0.77              | 0.69 | 0.62, 0.76              |
| PREFER in AF model*                        | 0.67  | 0.57, 0.76              | 0.75 | 0.68, 0.83              |
| <b>Major Bleeding</b>                      |       |                         |      |                         |
| HAS-BLED                                   | 0.65  | 0.58, 0.72              | 0.64 | 0.59, 0.70              |
| CHA <sub>2</sub> DS <sub>2</sub> -VASc     | 0.58  | 0.52, 0.64              | 0.63 | 0.58, 0.69              |
| PREFER in AF model*                        | 0.66  | 0.58, 0.73              | 0.66 | 0.60, 0.72              |

AUC, area under the curve.

\*PREFER in AF model refers to the combination of variables identified by stepwise regression in the current analyses (age, lack of guideline compliance in anticoagulant therapy, non-vitamin K antagonist, previous ischemic stroke/TIA/ischemic-thromboembolic event, pharmacological cardioversion, antiplatelet agents, non-steroidal anti-inflammatory drugs intake, heart failure for stroke; age, major bleeding, chronic hepatic disease, chronic renal insufficiency, heart valve replaced, vitamin K antagonists only for bleeding).

The AUCs of the PREFER in AF models were corrected for over-optimism as outlined in the methods.
